# Supplementary material for: Dendrite intercalation between epidermal cells tunes nociceptor sensitivity to mechanical stimuli in Drosophila larvae
Source: PubMed Central journal article supplement (PMC11075839; doi:10.1371/journal.pgen.1011237), 2024-04-25
Supplement: pgen.1011237.s011.pdf [file pgen.1011237.s011.pdf]

**Table S2. Alleles used in this study**

| <b>Allele</b>               | <b>Uses / Features</b>                           | <b>Identifier (RRID)</b> |
|-----------------------------|--------------------------------------------------|--------------------------|
| 5-40-GAL4                   | GAL4 driver (PNS neurons)                        | Flybase_FBal0221791      |
| 98b-GAL4                    | GAL4 driver (C1da neurons)                       | Flybase_FBal0305321      |
| Act5C-GAL4                  | GAL4 driver (ubiquitous)                         | BDSC_3954                |
| A58-GAL4                    | GAL4 driver (epidermis)                          | Flybase_FBal0181674      |
| en2.4-GAL4                  | GAL4 driver (epidermis)                          | BDSC_30564               |
| miR-14-GAL4                 | GAL4 driver ( <i>miR-14</i> expression domain)   | This study               |
| NompC-GAL4                  | GAL4 driver (C3da neurons)                       | BDSC_36361               |
| ppk-GAL4                    | GAL4 driver (C4da neurons)                       | BDSC_32079               |
| R38F11-GAL4                 | GAL4 driver (epidermis)                          | BDSC_50014               |
| sr-GAL4                     | GAL4 driver (apodemes)                           | BDSC_26663               |
| ppk-LexA                    | LexA driver (C4da neurons)                       | Flybase_FBal0336342      |
| UAS-mCherry.scramble.sponge | Knockdown (control miRNA sponge)                 | BDSC_61501               |
| UAS-mCherry.miR-14.sponge   | Knockdown ( <i>miR-14</i> sponge)                | BDSC_61382               |
| UAS-eiger <sup>IR</sup>     | Knockdown ( <i>eiger</i> RNAi line)              | BDSC_58993               |
| UAS-Inx2RNAi                | Knockdown ( <i>Inx2</i> RNAi line)               | BDSC_42645               |
| UAS-LUC                     | Knockdown ( <i>Luciferase</i> RNAi line)         | BDSC_31603               |
| UAS-ogreRNAi                | Knockdown ( <i>ogre</i> RNAi line)               | BDSC_44048               |
| FRT42D                      | MARCM reagent                                    | BDSC_1802                |
| SOP-FLP                     | MARCM reagent                                    | Flybase_FBal0278148      |
| Tub-GAL80                   | MARCM reagent                                    | BDSC_9917                |
| ban <sup>Δ1</sup>           | Mutant allele                                    | BDSC_58878               |
| cora <sup>5</sup>           | Mutant allele                                    | BDSC_52233               |
| Dcr1 <sup>mn29</sup>        | Mutant allele                                    | This study               |
| dlg1 <sup>A</sup>           | Mutant allele                                    | BDSC_57086               |
| Drosha <sup>21K11</sup>     | Mutant allele                                    | Flybase_FBal0268190      |
| inx2 <sup>G0118</sup>       | Mutant allele                                    | BDSC_11826               |
| kune <sup>C309</sup>        | Mutant allele                                    | BDSC_16333               |
| mdi1 <sup>242</sup>         | Mutant allele                                    | This study               |
| mdi2 <sup>246</sup>         | Mutant allele                                    | This study               |
| mdi3 <sup>442</sup>         | Mutant allele                                    | This study               |
| mdi4 <sup>51</sup>          | Mutant allele                                    | This study               |
| miR-14 <sup>Δ1</sup>        | Mutant allele                                    | BDSC_33067               |
| miR-14 <sup>k10213</sup>    | Mutant allele                                    | BDSC_10982               |
| nan <sup>GAL4</sup>         | Mutant allele                                    | BDSC_68205               |
| NompC <sup>1</sup>          | Mutant allele                                    | BDSC_42260               |
| NompC <sup>3</sup>          | Mutant allele                                    | BDSC_42258               |
| Nrg <sup>14</sup>           | Mutant allele                                    | BDSC_5708                |
| ogre <sup>1</sup>           | Mutant allele                                    | Flybase_FBal0013231      |
| pain <sup>1</sup>           | Mutant allele                                    | BDSC_27895               |
| piezo <sup>KO</sup>         | Mutant allele                                    | BDSC_58770               |
| ppk <sup>ESB</sup>          | Mutant allele                                    | BDSC_79622               |
| shg <sup>2</sup>            | Mutant allele                                    | BDSC_3085                |
| Tig <sup>A1</sup>           | Mutant allele                                    | BDSC_8795                |
| Tig <sup>x</sup>            | Mutant allele                                    | BDSC_8796                |
| TrpA1 <sup>1</sup>          | Mutant allele                                    | BDSC_26263               |
| UAS-dsRed-miR-14            | Overexpression/rescue construct                  | BDSC_59868               |
| UAS-if                      | Overexpression/rescue construct                  | Flybase_FBal0062798      |
| UAS-Inx2.Sb                 | Overexpression/rescue construct                  | Flybase_FBal0338197      |
| UAS-LUC-miR-14.T            | Overexpression/rescue construct                  | BDSC_41178               |
| UAS-mew                     | Overexpression/rescue construct                  | Flybase_FBal0062567      |
| UAS-ogre.S                  | Overexpression/rescue construct                  | Flybase_FBal0338192      |
| UAS-TNT                     | Overexpression/rescue construct                  | BDSC_28997               |
| Ilk <sup>ZCL3111</sup>      | Reporter (muscle adhesion sites; GFP-tagged Ilk) | BDSC_6831                |

|                                        |                                         |                     |
|----------------------------------------|-----------------------------------------|---------------------|
| <i>inx2</i> <sup>V5</sup>              | Reporter (V5-tagged Inx2)               | Flybase_FBal0345156 |
| <i>Mhc::mCherry</i>                    | Reporter (muscle)                       | Flybase_FBal0358776 |
| <i>ogre</i> <sup>V5</sup>              | Reporter (V5-tagged Ogre)               | Flybase_FBal0345155 |
| <i>Nrg167GFP</i>                       | Reporter (epidermal septate junctions)  | BDSC_6844           |
| <i>Nrx-IV-GFP</i>                      | Reporter (epidermal septate junctions)  | BDSC_50798          |
| <i>ppk-CD4-tdGFP</i> <sup>1b</sup>     | Reporter (C4da neurons)                 | BDSC_35842          |
| <i>ppk-CD4-tdTomato</i> <sup>10A</sup> | Reporter (C4da neurons)                 | BDSC_35845          |
| <i>rhea</i> <sup>MI00296-mCh.0</sup>   | Reporter (Apodemes; Cherry-tagged Rhea) | BDSC_39648          |
| <i>shg</i> <sup>mCherry</sup>          | Reporter (epidermal adherens junctions) | BDSC_59014          |
| <i>trol-GFP</i>                        | Reporter (epidermal BM)                 | Flybase_FBal0243610 |
| <i>Tub-GFP</i>                         | Reporter (control miRNA sensor)         | FBtp0017439         |
| <i>Tub-GFP.mir-14</i>                  | Reporter ( <i>mir-14</i> sensor)        | FBtp0056974         |
| <i>UAS-2xEGFP</i>                      | Reporter (cytosolic EGFP)               | BDSC_60293          |
| <i>UAS-CD4-tdGFP</i>                   | Reporter (membrane-targeted GFP)        | BDSC_35839          |
| <i>UAS-dsRed</i>                       | Reporter (RFP)                          | BDSC_6282           |
| <i>UAS-GCaMP6s</i>                     | Reporter (calcium imaging)              | BDSC_42749          |
| <i>AOP-GCaMP6s</i>                     | Reporter (calcium imaging)              | BDSC_44273          |
| <i>UAS-Gerry</i>                       | Reporter (ratiometric calcium imaging)  | BDSC_80141          |
| <i>UAS-mCD8-GFP</i>                    | Reporter (membrane-targeted GFP)        | BDSC_5137           |
| <i>UAS-NLS-GFP</i>                     | Reporter (nuclear-targeted GFP)         | BDSC_4776           |
| <i>UAS-PLC<sup>δ</sup>-PH-GFP</i>      | Reporter (PIP2 reporter)                | BDSC_39693          |
| <i>UAS-RedStinger</i> <sup>4</sup>     | Reporter (NLS-RFP)                      | BDSC_8546           |
| <i>UAS-tdTomato</i>                    | Reporter (RFP)                          | BDSC_36328          |
